# Supplementary material for: The tick biocontrol agent Metarhizium brunneum (= M. anisopliae) (strain F52) does not reduce non-target arthropods
Source: PLoS One. 2017 Nov 20;12(11):e0187675. doi: 10.1371/journal.pone.0187675 (PMC5695842; doi:10.1371/journal.pone.0187675)
Supplement: S1 Table — There was a significant effect of habitat. (CSV) [file pone.0187675.s002.csv]

Model term	Res.Df	Df.diff	LR	Pr(>LR)
(Intercept)	103	NA	NA	NA
period	102	1	23.1	0.35
habitat	101	1	153.8	0.001
location	89	12	332.9	0.003
